# Supplementary material
Source: PubMed Central journal article supplement (PMC9375100)
Supplement: NIHMS1826176-supplement-Supplemental_material.pdf [file NIHMS1826176-supplement-Supplemental_material.pdf]

# Signals of muscle relaxant drug interactions associated with unintentional traumatic injury: A population-based screening study

Ghadeer K. Dawwas, PhD, MSc, MBA<sup>1,2,3</sup>, Sean Hennessy, PharmD, PhD<sup>1,2,3,4</sup>, Colleen M. Brensinger, MS<sup>1,2</sup>, Emily K. Acton, MSCE<sup>1,2,5</sup>, Warren B. Bilker, PhD<sup>1,6</sup>, Sophie Chung, PharmD<sup>7</sup>, Sascha Dublin, MD, PhD<sup>8,9</sup>, John R. Horn, PharmD<sup>10</sup>, Melanie M. Manis, PharmD<sup>11</sup>, Todd A. Miano, PharmD, PhD<sup>1,2</sup>, David W. Oslin, MD<sup>1,6,12</sup>, Thanh Phuong Pham Nguyen, PharmD, MBA, MSCE<sup>1,2,5,13</sup>, Samantha E. Soprano, MPH, MBDS<sup>1,2</sup>, Douglas J. Wiebe, PhD<sup>2,3,14</sup>, Charles E. Leonard, PharmD, MSCE<sup>1,2,3</sup>

## Affiliations

1. Center for Pharmacoepidemiology Research and Training, Center for Clinical Epidemiology and Biostatistics, University of Pennsylvania, Philadelphia, PA, US
2. Department of Biostatistics, Epidemiology, and Informatics, Perelman School of Medicine, University of Pennsylvania, Philadelphia, PA, US
3. Leonard Davis Institute of Health Economics, University of Pennsylvania (Philadelphia, PA, US)
4. Department of Systems Pharmacology and Translational Therapeutics, Perelman School of Medicine, University of Pennsylvania, Philadelphia, PA, US
5. Translational Center of Excellence for Neuroepidemiology and Neurology Outcomes Research, Department of Neurology, Perelman School of Medicine, University of Pennsylvania, Philadelphia, PA, US
6. Department of Psychiatry, Perelman School of Medicine, University of Pennsylvania, Philadelphia, PA, US
7. AthenaHealth, Inc., Watertown, MA, US
8. Kaiser Permanente Washington Health Research Institute, Seattle, WA, US
9. Department of Epidemiology, School of Public Health, University of Washington, Seattle, WA, US
10. Department of Pharmacy, School of Pharmacy, University of Washington, Seattle, WA, US
11. Department of Pharmacy Practice, McWhorter School of Pharmacy, Samford University, Birmingham, AL, US
12. Mental Illness Research, Education, and Clinical Center, Corporal Michael J. Crescenz Veterans Administration Medical Center, Philadelphia, PA, US
13. Department of Neurology, University of Pennsylvania Perelman School of Medicine, Philadelphia, PA
14. Penn Injury Science Center, University of Pennsylvania, Philadelphia, PA, US

## Correspondence

Charles E. Leonard, Department of Biostatistics, Epidemiology, and Informatics, Perelman School of Medicine, University of Pennsylvania, 807 Blockley Hall, 423 Guardian Drive, Philadelphia, PA 19104, US. Telephone: 1-215-573-2663. Fax: 1-215-573-5315. Email: celeonar@pennmedicine.upenn.edu.

**Supplemental Figure S1.** Examples of eligibility and non-eligibility in the self-controlled case series studies

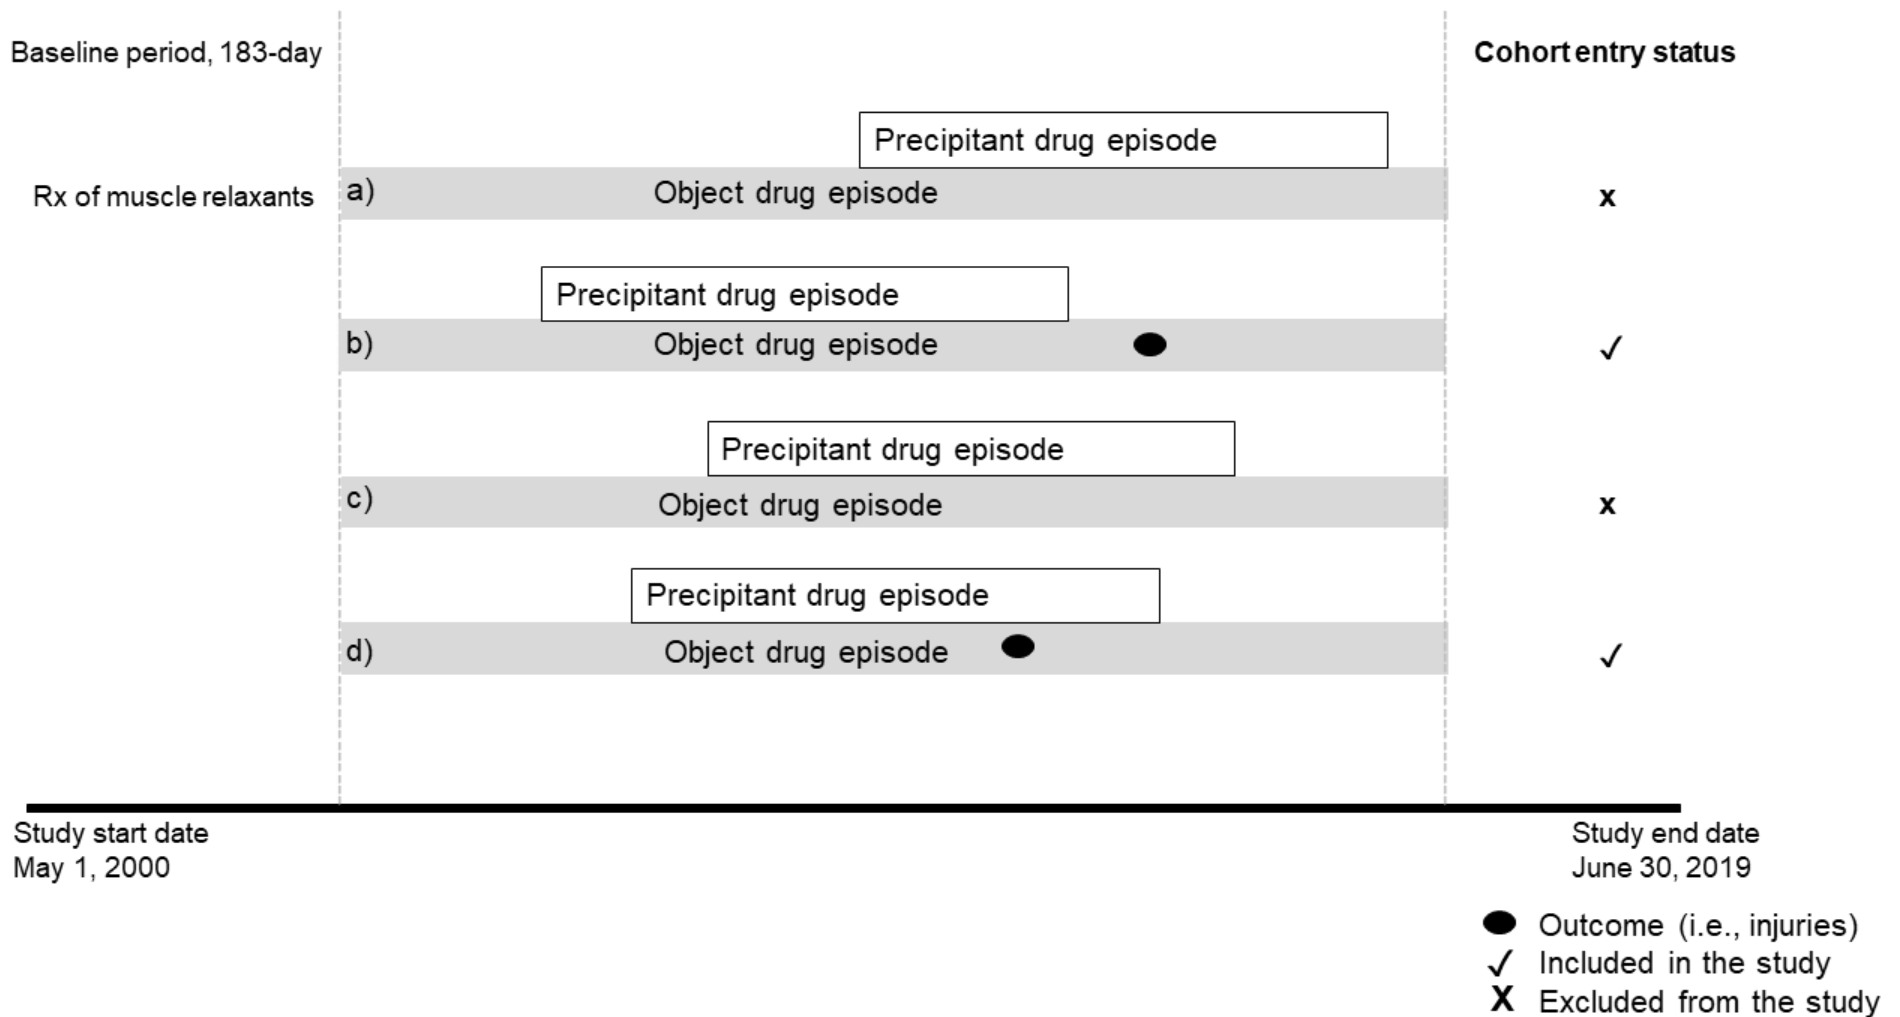

The figure illustrates scenarios of cohort entry

Patient a was excluded because of muscle relaxant use during the baseline period.

Patients b and d were included given the absence of baseline muscle relaxant use and presence of an injury during the observation period.

Patient c was excluded given the absence of an injury during the observation period.

**Supplemental Figure S2.** Scenarios of subsequent episode eligibility

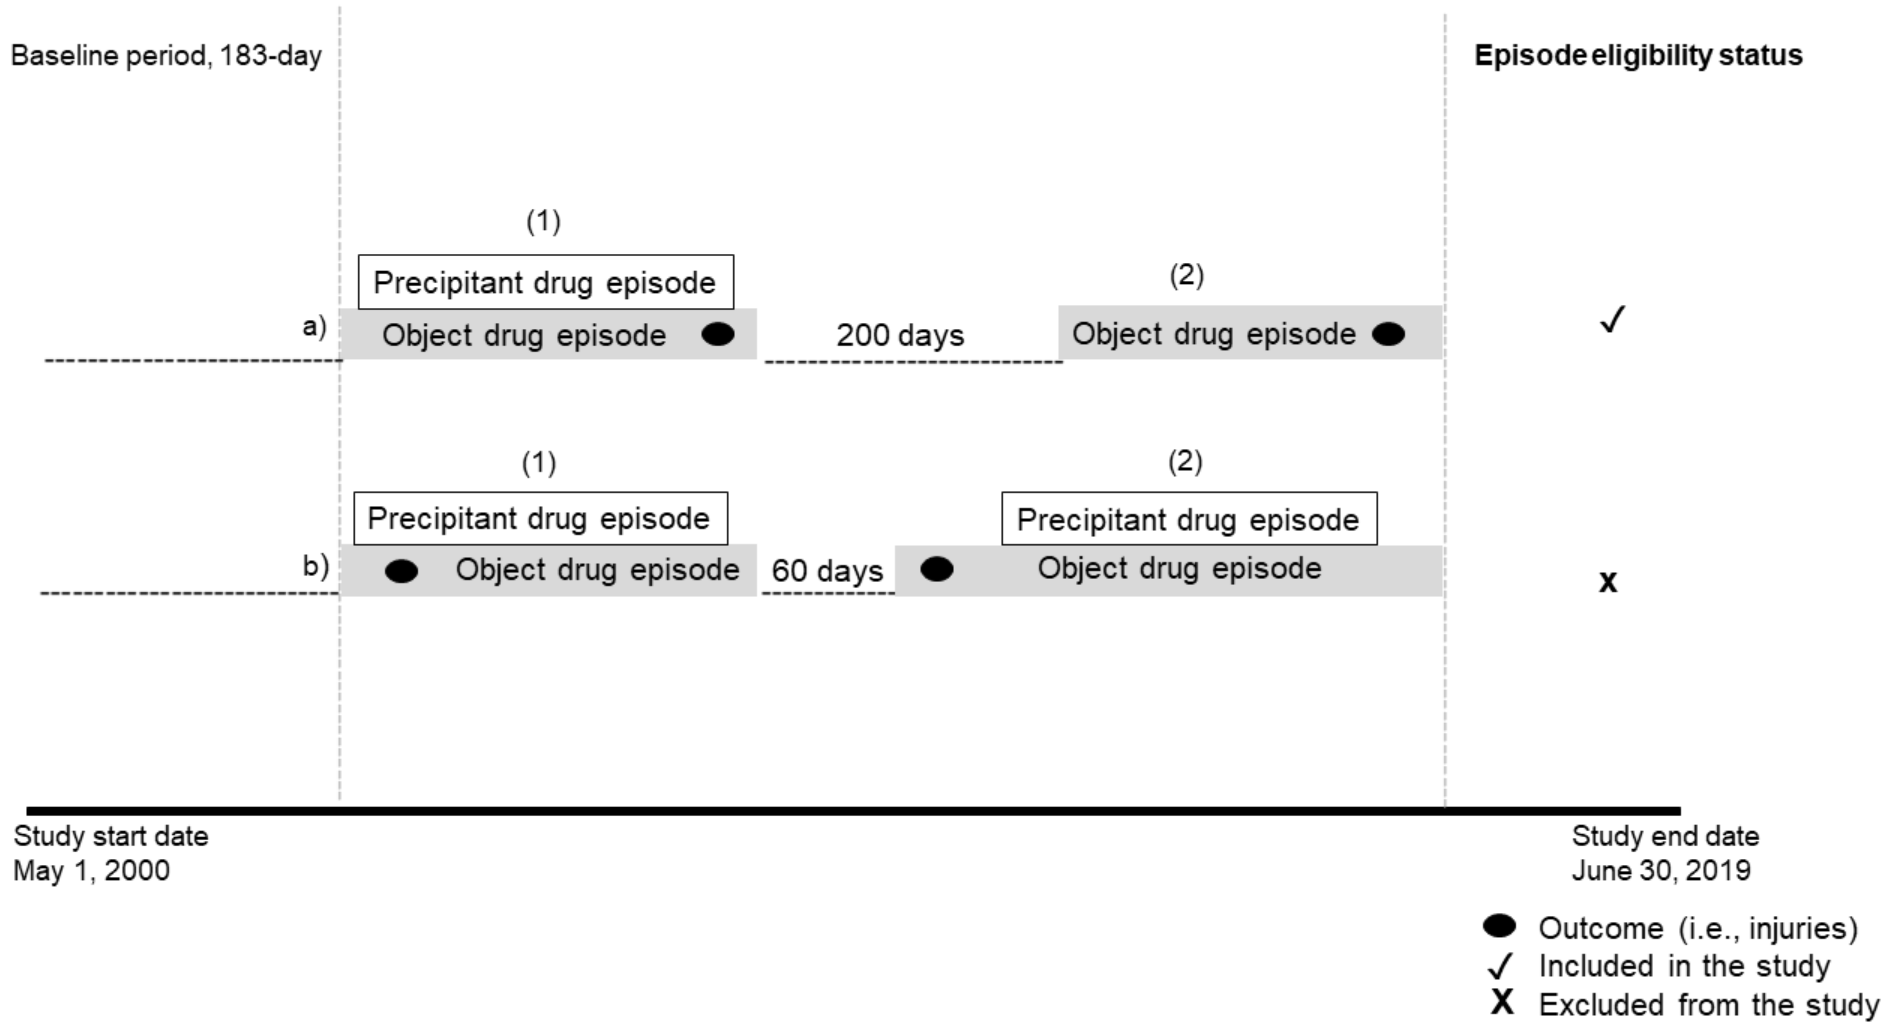

The figure illustrates subsequent episodes eligibility status.

For patient a, the subsequent episode is included since the washout period between episodes 1 and 2 is  $\geq 183$  days.

For patient b, the subsequent episode is excluded since the washout period between episodes 1 and 2 is  $< 183$  days.

**Supplemental Table S1. Outcome definitions**

| Outcome                                                                                                  | Discharge diagnosis position and claim type                                                                                                                                                    | ICD-9-CM discharge diagnosis code(s)                                                                                                                                                                                                                                                                                                                                                                                                                                                                                                                   | Performance characteristics and/or other supporting information                                                                                                                                                                                                                                                                                                                                                                                                                                                                                                                                                                                                                                                                                                                                                                                                                                                                                                                                                                                                                                                                                                                                                                                                                                                                                                                                                                                                                                                                                         | Adaptation to ICD-10-CM era                                                                                                                                                                                                                                                                                                                                                                                                                                                                                                                                                                                                                                                                                                                                                                                                                                                                                                                                                                                                                                                                                                               |
|----------------------------------------------------------------------------------------------------------|------------------------------------------------------------------------------------------------------------------------------------------------------------------------------------------------|--------------------------------------------------------------------------------------------------------------------------------------------------------------------------------------------------------------------------------------------------------------------------------------------------------------------------------------------------------------------------------------------------------------------------------------------------------------------------------------------------------------------------------------------------------|---------------------------------------------------------------------------------------------------------------------------------------------------------------------------------------------------------------------------------------------------------------------------------------------------------------------------------------------------------------------------------------------------------------------------------------------------------------------------------------------------------------------------------------------------------------------------------------------------------------------------------------------------------------------------------------------------------------------------------------------------------------------------------------------------------------------------------------------------------------------------------------------------------------------------------------------------------------------------------------------------------------------------------------------------------------------------------------------------------------------------------------------------------------------------------------------------------------------------------------------------------------------------------------------------------------------------------------------------------------------------------------------------------------------------------------------------------------------------------------------------------------------------------------------------------|-------------------------------------------------------------------------------------------------------------------------------------------------------------------------------------------------------------------------------------------------------------------------------------------------------------------------------------------------------------------------------------------------------------------------------------------------------------------------------------------------------------------------------------------------------------------------------------------------------------------------------------------------------------------------------------------------------------------------------------------------------------------------------------------------------------------------------------------------------------------------------------------------------------------------------------------------------------------------------------------------------------------------------------------------------------------------------------------------------------------------------------------|
| <p><b>Unintentional traumatic injury</b><br/><i>(primary outcome)</i></p>                                | <p>Any-position discharge diagnosis on an ED claim</p> <p>or</p> <p>Principal inpatient discharge diagnosis on an inpatient hospitalization claim</p>                                          | <p>fracture (800–829)<br/>dislocation (830–839)<br/>sprain/strain (840–848)<br/>intracranial injury (850–854)<br/>internal injury of thorax, abdomen, or pelvis (860–869)<br/>open wound (870–897)<br/>injury to blood vessels (900–904)<br/>crushing injury (925–929)<br/>injury to nerves or spinal cord (950–957)<br/>certain traumatic complications and unspecified injuries (958–959)</p>                                                                                                                                                        | <p>Adapted from the injury definition used by the American College of Surgeons' NTDB Data Standard (version 03.2015).</p> <p>NTDB's injury definition explicitly excludes the following: late effects of injuries, poisonings, toxic effects, and other external causes; superficial injury; contusion with intact skin surface; and effects of a foreign body entering through orifice.</p> <p>Our adapted definition further excluded burns (as these are unlikely due to a drug interaction), consistent with work by Sears et al. <i>J Occup Rehabil</i> 2015;25(4).</p>                                                                                                                                                                                                                                                                                                                                                                                                                                                                                                                                                                                                                                                                                                                                                                                                                                                                                                                                                                            | <p>Adapted from the injury definition used by the American College of Surgeons' NTDB Data Standard (updated October 2019)</p> <p>The definition included: injuries to specific body parts (S00–S99 with a 7<sup>th</sup> character modifier of A, B, or C only; excluding superficial injuries indicated by S00, S10, S20, S30, S40, S50, S60, S70, S80, or S90), unspecified multiple injuries (T07 with a 7<sup>th</sup> character modifier of A only), injury of unspecified body region (T14 with a 7<sup>th</sup> character modifier of A only), and traumatic compartment syndrome (T79.A1–T79.A9 with 7<sup>th</sup> character modifier of A only).</p> <p>This definition excludes: late effects of injury (identified by other 7<sup>th</sup> character modifiers); poisonings, toxic effects, and other external causes; superficial injury; effects of a foreign body entering through orifice; and burns.</p>                                                                                                                                                                                                                 |
| <p><b>Typical hip fracture</b><br/><i>(secondary outcome)</i></p>                                        | <p>Principal inpatient discharge diagnosis on an inpatient hospitalization claim</p>                                                                                                           | <p>closed transcervical fracture (820.00–820.09)<br/>open transcervical fracture (820.10–820.19)<br/>closed fracture of unspecified trochanteric section of femur (820.20)<br/>closed fracture of intertrochanteric section of femur (820.21)<br/>open fracture of unspecified trochanteric section of femur (820.30)<br/>open fracture of intertrochanteric section of femur (820.31)<br/>closed fracture of unspecified part of neck of femur (820.8)<br/>open fracture of unspecified part of neck of femur (820.9)</p>                             | <p>The inclusion of codes for typical closed hip fractures is supported by <a href="#">FDA Sentinel</a> and findings by Narogroeknawin et al. <i>Journal of Clinical Densitometry</i> 2012;15(1) using 2004–2008 health system data from the University of Alabama at Birmingham. The PPV for typical closed hip fracture ICD-9 discharge diagnosis codes in a principal position was 94%.</p> <p>The rationale for including typical open hip fractures codes was that such fractures can be caused by an injury.</p> <p>A hip fracture algorithm including typical open and closed hip fracture codes in 1996–1997 Norwegian data had a PPV and sensitivity of 84% and 90%, respectively (<a href="#">Lofthus et al. J Clin Epidemiol 2005;58</a>). Typical open and closed hip fracture codes are a component of <a href="#">AHRQ's hip fracture mortality rate quality indicator</a>.</p> <p>The rationale for excluding pathologic fracture codes (e.g., ICD-9 733.14) was that such fractures are due to a localized process such as malignancy or infection (Curtis et al. <i>Osteoporos Int</i> 2009;20); their exclusion should have had minimal impact on precision, as ~3% of closed hip fractures are coded as pathologic.</p> <p>The rationale for excluding atypical (i.e., subtrochanteric and diaphyseal) hip fracture codes (e.g., ICD-9 820.22) was that such fractures are associated with no or minimal trauma and commonly attributed to the use of bisphosphonates and/or glucocorticoids (Shane et al. <i>JBMR</i> 2014;29).</p> | <p>An ICD-10-CM algorithm was mapped from ICD-9-CM codes for transcervical, trochanteric, pertrochanteric, and femoral neck fractures.</p> <p>We used a principal inpatient discharge diagnosis of fracture of head and neck of femur (ICD-10-CM S72.0* with a 7<sup>th</sup> character modifier of A, B, or C only) or pertrochanteric fracture (ICD-10-CM S72.1* with a 7<sup>th</sup> character modifier of A, B, or C only).</p> <p>This definition is partially supported by a validation of Finnish registry data by Sund et al (<a href="#">Methods Inf Med 2007;46:558-566</a>) that reported specificities and sensitivities of 99% (95–100%) and 69% (53–84%) for trochanteric fractures and 81% (68–92%) and 97% (92–100%) for femoral neck fractures; these findings were highlighted in a systemic review by Hudson et al (<a href="#">J Clin Epi 2013;66:278-285</a>). While Canadian-based ICD-10 validation work by Park-Wyllie et al (<a href="#">JAMA 2011;305:783-789</a>) initially seemed relevant, the authors validated atypical fracture codes (ICD-10 S72.2, S72.3) that we exclude for reasons based above.</p> |
| <p><b>Unintentional motor vehicle crash while subject was driving</b><br/><i>(secondary outcome)</i></p> | <p>Unintentional traumatic injury (see primary above)</p> <p>and</p> <p>Any-position discharge diagnosis, arising from the same hospital presentation as the injury, on an ED or inpatient</p> | <p>MVTA, injuring the driver, in collision with train (E810.0)<br/>MVTA, injuring the driver, in re-entrant collision with another motor vehicle (E811.0)<br/>MVTA, injuring the driver, other, in collision with motor vehicle (E812.0)<br/>MVTA, injuring the driver, in collision with other vehicle (E813.0)<br/>MVTA, injuring the driver, in collision with pedestrian (E814.0)<br/>MVTA, injuring the driver, other, in collision on highway (E815.0)<br/>MVTA, injuring the driver, loss of control, without collision on highway (E816.0)</p> | <p>The PPV and sensitivity for the motor vehicle crash component of the outcome definition are 88–89% and 97%, respectively (<a href="#">LeMier et al. Inj Prev 2001;7</a> and <a href="#">Bowman et al. Perspect Health Inf Manag 2011;8</a>).</p> <p>The inclusion of motor vehicle accident codes of an unintentional manner and exclusion of self-inflicted, assault, and undetermined manner motor vehicle accident codes is supported by the CDC Injury Center's <a href="#">E-Code Grouping Matrix</a>.</p>                                                                                                                                                                                                                                                                                                                                                                                                                                                                                                                                                                                                                                                                                                                                                                                                                                                                                                                                                                                                                                      | <p>In the transition from ICD-9-CM to ICD-10-CM, ECOI E-codes were supplanted by codes beginning with V, W, X and Y (<a href="#">ICD-10-CM Chapter 20: External Causes of Morbidity</a>). ICD-10-CM codes beginning with the letter V are used for transportation related injuries.</p> <p>A code's second character indicates the victim's mode of transport (e.g., car occupant, pedestrian). We required that outcome-defining events had a second character indicating a motor vehicle. The third character indicates the accident's circumstance (e.g., collision with car, non-collision transport accident). The fourth character generally indicates the victim's activity (e.g., driver vs. passenger) and whether the incident occurred in a traffic or non-traffic situation. We required that outcome-defining events had a fourth character indicating the driver. The fifth and sixth characters are generally X-filled</p>                                                                                                                                                                                                 |

|  |                       |                                                                                                                                                                                                                                                                                                                                                                                                                                                                                                                                                                                                                                                                                   |  |                                                                                                                                                                                                                                                                                                                                                                                                                                                                                                                                                                                                  |
|--|-----------------------|-----------------------------------------------------------------------------------------------------------------------------------------------------------------------------------------------------------------------------------------------------------------------------------------------------------------------------------------------------------------------------------------------------------------------------------------------------------------------------------------------------------------------------------------------------------------------------------------------------------------------------------------------------------------------------------|--|--------------------------------------------------------------------------------------------------------------------------------------------------------------------------------------------------------------------------------------------------------------------------------------------------------------------------------------------------------------------------------------------------------------------------------------------------------------------------------------------------------------------------------------------------------------------------------------------------|
|  | hospitalization claim | <p>MVTA, injuring the driver, noncollision, while boarding or alighting (E817.0)</p> <p>MVTA, injuring the driver, other noncollision (E818.0)</p> <p>MVTA, injuring the driver, unspecified nature (E819.0)</p> <p>MVNTA, injuring the driver, motor-driven snow vehicle (E820.0)</p> <p>MVNTA, injuring the driver, off-road motor vehicle (E821.0)</p> <p>MVNTA, injuring the driver, other, in collision with moving object (E822.0)</p> <p>MVNTA, injuring the driver, other, in collision with stationary object (E823.0)</p> <p>MVNTA, injuring the driver, other, while boarding or alighting (E824.0)</p> <p>MVNTA, injuring the driver, unspecified nature (E825.0)</p> |  | <p>placeholders intended for future expansion. The seventh character indicates an initial encounter vs. subsequent encounter vs. sequela. We required that outcome-defining events had a seventh character indicating an initial encounter.</p> <p>We excluded MVC events with one of the following any-position emergency department or any-position inpatient discharge diagnoses co-occurring with an ECOI of interest: intentional self-harm by crashing of motor vehicle (X82*); assault by crashing of motor vehicle (Y03*); or crashing of motor vehicle, undetermined intent (Y32*).</p> |
|--|-----------------------|-----------------------------------------------------------------------------------------------------------------------------------------------------------------------------------------------------------------------------------------------------------------------------------------------------------------------------------------------------------------------------------------------------------------------------------------------------------------------------------------------------------------------------------------------------------------------------------------------------------------------------------------------------------------------------------|--|--------------------------------------------------------------------------------------------------------------------------------------------------------------------------------------------------------------------------------------------------------------------------------------------------------------------------------------------------------------------------------------------------------------------------------------------------------------------------------------------------------------------------------------------------------------------------------------------------|

AHRQ = Agency for Healthcare Research and Quality; CDC = Centers for Disease Control and Prevention; ED = emergency department; FDA = Food and Drug Administration; ICD-9-CM = international classification of diseases 9th revision clinical modification; MVC= motor vehicle crash; MVTA = motor vehicle traffic accident; MVNTA = motor vehicle nontraffic accident; NTDB = National Trauma Data Bank; PPV = positive predictive value

**Supplemental Table S2.** Characteristics of cohorts of new users of muscle relaxants experiencing a typical hip fracture or motor vehicle crash (secondary outcomes) in which the subject was driving, by object drug of interest

|                                                  | Baclofen                     | Carisoprodol        | Chlorzoxazone       | Cyclobenzaprine     | Dantrolene          | Metaxalone          | Methocarbamol       | Orphenadrine        | Tizanidine          |                     |
|--------------------------------------------------|------------------------------|---------------------|---------------------|---------------------|---------------------|---------------------|---------------------|---------------------|---------------------|---------------------|
| <b>Typical hip fracture</b>                      | <b>N</b>                     | 239                 | 90                  | 14                  | 542                 | 2                   | 49                  | 84                  | 18                  | 270                 |
|                                                  | <b>Demographics</b>          |                     |                     |                     |                     |                     |                     |                     |                     |                     |
|                                                  | Age in years, median (Q1-Q3) | 72.5<br>(63.6-79.9) | 72.7<br>(60.5-78.4) | 68.0<br>(59.0-78.0) | 74.5<br>(64.6-80.6) | 52.8<br>(42.0-63.6) | 71.6<br>(58.9-78.6) | 73.0<br>(60.8-78.9) | 78.6<br>(70.2-81.5) | 73.2<br>(65.9-79.7) |
|                                                  | Female, %                    | 66.5                | 74.4                | 85.7                | 74.7                | 0.0                 | 71.4                | 71.4                | 61.1                | 73.0                |
|                                                  | Race, %                      |                     |                     |                     |                     |                     |                     |                     |                     |                     |
|                                                  | Caucasian                    | 73.6                | 70.0                | 71.4                | 75.1                | 50.0                | 79.6                | 76.2                | 55.6                | 70.0                |
|                                                  | African American             | 9.2                 | 11.1                | 21.4                | 7.4                 | 0.0                 | 8.2                 | 9.5                 | 5.6                 | 11.5                |
|                                                  | Hispanic                     | 6.3                 | 5.6                 | 7.1                 | 6.6                 | 0.0                 | 2.0                 | 4.8                 | 5.6                 | 5.2                 |
|                                                  | Asian                        | 1.3                 | 1.1                 | 0.0                 | 1.1                 | 0.0                 | 0.0                 | 3.6                 | 0.0                 | 1.1                 |
|                                                  | Unknown                      | 9.6                 | 12.2                | 0.0                 | 9.8                 | 50.0                | 10.2                | 6.0                 | 33.3                | 12.2                |
|                                                  | Geographic division, %       |                     |                     |                     |                     |                     |                     |                     |                     |                     |
|                                                  | New England                  | 3.3                 | 0.0                 | 0.0                 | 3.5                 | 0.0                 | 2.0                 | 1.2                 | 0.0                 | 1.1                 |
|                                                  | Middle Atlantic              | 5.9                 | 3.3                 | 14.3                | 5.7                 | 0.0                 | 8.2                 | 1.2                 | 5.6                 | 3.7                 |
|                                                  | East North Central           | 10.0                | 2.2                 | 7.1                 | 14.0                | 50.0                | 18.4                | 11.9                | 11.1                | 14.8                |
|                                                  | West North Central           | 7.9                 | 5.6                 | 7.1                 | 8.9                 | 50.0                | 12.2                | 14.3                | 16.7                | 7.8                 |
|                                                  | South Atlantic               | 34.7                | 35.6                | 35.7                | 28.6                | 0.0                 | 32.7                | 20.2                | 33.3                | 33.3                |
|                                                  | East South Central           | 3.8                 | 4.4                 | 0.0                 | 4.6                 | 0.0                 | 0.0                 | 8.3                 | 11.1                | 6.7                 |
|                                                  | West South Central           | 11.3                | 15.6                | 14.3                | 14.4                | 0.0                 | 14.3                | 14.3                | 5.6                 | 20.4                |
|                                                  | Mountain                     | 8.4                 | 13.3                | 14.3                | 10.3                | 0.0                 | 12.2                | 9.5                 | 11.1                | 7.0                 |
|                                                  | Pacific                      | 14.2                | 18.9                | 7.1                 | 10.0                | 0.0                 | 0.0                 | 19.0                | 5.6                 | 4.8                 |
| Unknown                                          | 0.4                          | 1.1                 | 0.0                 | 0.0                 | 0.0                 | 0.0                 | 0.0                 | 0.0                 | 0.4                 |                     |
| <b>Typical hip fracture, sum</b>                 | 239                          | 90                  | 14                  | 542                 | 2                   | 49                  | 84                  | 18                  | 272                 |                     |
| <b>Motor vehicle crash</b>                       | <b>N</b>                     | 92                  | 100                 | 7                   | 336                 | 1                   | 53                  | 66                  | 17                  | 172                 |
|                                                  | <b>Demographics</b>          |                     |                     |                     |                     |                     |                     |                     |                     |                     |
|                                                  | Age in years, median (Q1-Q3) | 59.7<br>(47.1-68.6) | 47.7<br>(37.4-57.0) | 31.3<br>(25.5-46.3) | 52.3<br>(39.1-63.7) | 75.9<br>(75.9-75.9) | 39.6<br>(27.8-50.0) | 47.8<br>(32.5-59.3) | 36.4<br>(29.7-54.3) | 58.0<br>(48.9-68.0) |
|                                                  | Female, %                    | 69.6                | 55.0                | 28.6                | 65.5                | 100.0               | 52.8                | 57.6                | 64.7                | 58.7                |
|                                                  | Race, %                      |                     |                     |                     |                     |                     |                     |                     |                     |                     |
|                                                  | Caucasian                    | 51.1                | 63.0                | 57.1                | 57.1                | 0.0                 | 64.2                | 56.1                | 64.7                | 57.0                |
|                                                  | African American             | 21.7                | 11.0                | 14.3                | 23.2                | 100.0               | 15.1                | 13.6                | 17.6                | 22.7                |
|                                                  | Hispanic                     | 8.7                 | 12.0                | 0.0                 | 7.4                 | 0.0                 | 3.8                 | 10.6                | 5.9                 | 9.9                 |
|                                                  | Asian                        | 1.1                 | 2.0                 | 14.3                | 1.5                 | 0.0                 | 1.9                 | 1.5                 | 0.0                 | 0.0                 |
|                                                  | Unknown                      | 17.4                | 12.0                | 14.3                | 10.7                | 0.0                 | 15.1                | 18.2                | 11.8                | 10.5                |
|                                                  | Geographic division, %       |                     |                     |                     |                     |                     |                     |                     |                     |                     |
|                                                  | New England                  | 2.2                 | 2.0                 | 0.0                 | 2.1                 | 0.0                 | 1.9                 | 4.5                 | 5.9                 | 1.7                 |
|                                                  | Middle Atlantic              | 2.2                 | 0.0                 | 0.0                 | 1.2                 | 0.0                 | 1.9                 | 4.5                 | 0.0                 | 1.2                 |
|                                                  | East North Central           | 9.8                 | 8.0                 | 0.0                 | 12.8                | 0.0                 | 17.0                | 18.2                | 35.3                | 14.0                |
|                                                  | West North Central           | 7.6                 | 7.0                 | 28.6                | 9.8                 | 0.0                 | 9.4                 | 3.0                 | 5.9                 | 5.2                 |
|                                                  | South Atlantic               | 37.0                | 33.0                | 0.0                 | 38.7                | 100.0               | 43.4                | 22.7                | 29.4                | 41.9                |
|                                                  | East South Central           | 8.7                 | 6.0                 | 28.6                | 6.5                 | 0.0                 | 5.7                 | 3.0                 | 5.9                 | 12.8                |
|                                                  | West South Central           | 13.0                | 18.0                | 0.0                 | 12.8                | 0.0                 | 11.3                | 16.7                | 0.0                 | 9.3                 |
|                                                  | Mountain                     | 10.9                | 10.0                | 28.6                | 9.5                 | 0.0                 | 7.5                 | 22.7                | 11.8                | 9.3                 |
|                                                  | Pacific                      | 8.7                 | 16.0                | 14.3                | 6.3                 | 0.0                 | 1.9                 | 4.5                 | 5.9                 | 4.1                 |
| Unknown                                          | 0.0                          | 0.0                 | 0.0                 | 0.3                 | 0.0                 | 0.0                 | 0.0                 | 0.0                 | 0.6                 |                     |
| <b>MVC in which the subject was driving, sum</b> | 94                           | 101                 | 10                  | 345                 | 1                   | 53                  | 67                  | 17                  | 177                 |                     |

MVC = motor vehicle crash in which the subject was driving; Q = quartile

**Supplemental Table S3.** Summary of time-varying confounder prevalence during observation periods, by object drugs of interest

| Outcome                                         | Time-varying covariates                                                                       | Object drug cohort |                 |                  |                  |                |                  |                  |               |                |
|-------------------------------------------------|-----------------------------------------------------------------------------------------------|--------------------|-----------------|------------------|------------------|----------------|------------------|------------------|---------------|----------------|
|                                                 |                                                                                               | Baclofen           | Carisoprodol    | Chlorzoxazone    | Cyclobenzaprine  | Dantrolene     | Metaxalone       | Methocarbamol    | Orphenadrine  | Tizanidine     |
| % unless otherwise noted                        |                                                                                               |                    |                 |                  |                  |                |                  |                  |               |                |
| <b>Unintentional traumatic injury (primary)</b> | Object drug average daily dose (mg), median (Q1-Q3)                                           | 30 (20.0-30.0)     | 1050 (700-1167) | 1500 (1125-2000) | 15 (10.0-30.0)   | 100 (50.0-100) | 2400 (1600-2400) | 1500 (1000-2250) | 200 (200-200) | 8 (4.0-12.0)   |
|                                                 | Unintentional traumatic injury, ever prior to the day of observation*, person-days            | 845,733            | 509,403         | 24,917           | 1,317,657        | 7,195          | 111,379          | 231,729          | 44,360        | 1,190,419      |
|                                                 | Unintentional traumatic injury, ever prior to the first day of observation*, % episodes       | 72.9               | 66.9            | 71.4             | 71.2             | 59.5           | 69.3             | 74.9             | 71.9          | 72.9           |
|                                                 | Fracture                                                                                      | 42.7               | 27.5            | 24.2             | 27.1             | 36.0           | 22.6             | 31.3             | 23.6          | 38.7           |
|                                                 | Dislocation/sprain/strain                                                                     | 66.7               | 81.2            | 78.7             | 80.1             | 64.0           | 84.1             | 80.4             | 80.8          | 71.7           |
|                                                 | Intracranial injury                                                                           | 9.9                | 5.7             | 4.4              | 5.7              | 20.0           | 4.9              | 6.6              | 4.9           | 8.1            |
|                                                 | Internal injury of thorax, abdomen, or pelvis                                                 | 4.9                | 2.6             | 2.0              | 2.3              | 8.0            | 1.9              | 3.0              | 2.0           | 3.5            |
|                                                 | Open wound                                                                                    | 34.4               | 23.5            | 23.1             | 21.7             | 32.0           | 17.7             | 24.2             | 20.6          | 31.0           |
|                                                 | Injury to blood vessels                                                                       | 1.0                | 0.7             | 1.1              | 0.5              | 8.0            | 0.3              | 0.7              | 0.2           | 0.8            |
|                                                 | Crushing injury                                                                               | 1.2                | 0.9             | 0.9              | 0.8              | 0.0            | 0.4              | 0.8              | 0.6           | 1.2            |
|                                                 | Injury to nerves or spinal cord                                                               | 4.5                | 2.5             | 2.6              | 2.2              | 16.0           | 1.8              | 2.4              | 1.5           | 3.7            |
|                                                 | Certain traumatic complications, unspecified injuries, and other specified injuries           | 57.8               | 38.9            | 41.5             | 40.1             | 68.0           | 29.4             | 44.1             | 36.5          | 55.1           |
| <b>Typical hip fracture (secondary)</b>         | Object drug average daily dose (mg), median (Q1-Q3)                                           | 20 (15.0-40.0)     | 1050 (700-1400) | 1500 (1500-2000) | 10 (10.0-20.0)   | 150 (50.0-400) | 1200 (800-2400)  | 2250 (1125-3000) | 194 (100-200) | 6.0 (4.0-8.0)  |
|                                                 | Hip Fracture, typical, ever prior to the day of observation*, person-days                     | 15,881             | 6,151           | 425              | 17,936           | 70             | 911              | 1,902            | 438           | 12,492         |
|                                                 | Hip Fracture, typical, ever prior to the first day of observation*, % episodes                | 9.2                | 7.8             | 7.1              | 9.8              | 0.0            | 18.4             | 9.5              | 5.6           | 6.7            |
| <b>Motor vehicle crash (secondary)</b>          | Object drug average daily dose (mg), median (Q1-Q3)                                           | 30 (30.0-60.0)     | 1050 (700-1050) | 1500 (1000-1500) | 20.0 (10.0-30.0) | 100 (100-100)  | 2400 (2400-2400) | 1500 (750-2250)  | 200 (200-300) | 8.0 (4.0-12.0) |
|                                                 | MVC in which the subject was driving, ever prior to the day of observation*, person-days      | 5,501              | 4,889           | 119              | 10,796           | 33             | 744              | 1,242            | 330           | 12,183         |
|                                                 | MVC in which the subject was driving, ever prior to the first day of observation*, % episodes | 12.0               | 9.0             | 42.9             | 13.7             | 0.0            | 9.4              | 15.2             | 5.9           | 9.9            |

MVC = motor vehicle crash in which the subject was driving; Q = quartile

\* diagnosis (any position, any claim type) ever prior to the day of observation

**Supplemental Table S4. Confounder adjusted rate ratios after semi-Bayes shrinkage for muscle relaxant drug interaction with opioids and risk of unintentional traumatic injury**

| Object drug     | Precipitant drug | Adjusted RR | 95% CI |      |
|-----------------|------------------|-------------|--------|------|
| Baclofen        | Codeine          | 0.93        | 0.73   | 1.20 |
| Carisoprodol    | Codeine          | 0.71        | 0.53   | 0.95 |
| Chlorzoxazone   | Codeine          | 0.87        | 0.43   | 1.77 |
| Cyclobenzaprine | Codeine          | 1.01        | 0.90   | 1.14 |
| Metaxalone      | Codeine          | 1.08        | 0.74   | 1.56 |
| Methocarbamol   | Codeine          | 0.89        | 0.67   | 1.20 |
| Orphenadrine    | Codeine          | 1.37        | 0.82   | 2.28 |
| Tizanidine      | Codeine          | 1.00        | 0.82   | 1.23 |
| Baclofen        | Hydrocodone      | 0.97        | 0.88   | 1.08 |
| Carisoprodol    | Hydrocodone      | 0.92        | 0.84   | 1.02 |
| Chlorzoxazone   | Hydrocodone      | 1.01        | 0.73   | 1.41 |
| Cyclobenzaprine | Hydrocodone      | 1.02        | 0.98   | 1.07 |
| Dantrolene      | Hydrocodone      | 1.00        | 0.44   | 2.26 |
| Metaxalone      | Hydrocodone      | 0.98        | 0.86   | 1.11 |
| Methocarbamol   | Hydrocodone      | 0.95        | 0.85   | 1.06 |
| Orphenadrine    | Hydrocodone      | 0.86        | 0.71   | 1.05 |
| Tizanidine      | Hydrocodone      | 0.88        | 0.81   | 0.95 |
| Baclofen        | Hydromorphone    | 0.75        | 0.53   | 1.05 |
| Carisoprodol    | Hydromorphone    | 1.11        | 0.74   | 1.66 |
| Chlorzoxazone   | Hydromorphone    | 1.36        | 0.61   | 2.99 |
| Cyclobenzaprine | Hydromorphone    | 0.69        | 0.54   | 0.90 |
| Metaxalone      | Hydromorphone    | 1.36        | 0.74   | 2.50 |
| Methocarbamol   | Hydromorphone    | 0.69        | 0.44   | 1.07 |
| Orphenadrine    | Hydromorphone    | 0.93        | 0.39   | 2.25 |
| Tizanidine      | Hydromorphone    | 0.73        | 0.54   | 0.99 |
| Tizanidine      | Levorphanol      | 1.08        | 0.43   | 2.69 |
| Baclofen        | Meperidine       | 1.31        | 0.60   | 2.88 |
| Carisoprodol    | Meperidine       | 0.99        | 0.55   | 1.79 |
| Cyclobenzaprine | Meperidine       | 1.09        | 0.65   | 1.84 |
| Metaxalone      | Meperidine       | 1.15        | 0.50   | 2.64 |
| Methocarbamol   | Meperidine       | 0.97        | 0.43   | 2.16 |
| Tizanidine      | Meperidine       | 0.73        | 0.34   | 1.55 |
| Baclofen        | Methadone        | 0.69        | 0.42   | 1.14 |
| Carisoprodol    | Methadone        | 0.96        | 0.55   | 1.65 |
| Cyclobenzaprine | Methadone        | 0.83        | 0.54   | 1.27 |
| Metaxalone      | Methadone        | 0.70        | 0.31   | 1.58 |
| Methocarbamol   | Methadone        | 0.86        | 0.46   | 1.61 |
| Tizanidine      | Methadone        | 0.84        | 0.53   | 1.33 |
| Baclofen        | Morphine         | 1.46        | 1.13   | 1.87 |
| Carisoprodol    | Morphine         | 0.80        | 0.55   | 1.15 |
| Chlorzoxazone   | Morphine         | 0.66        | 0.28   | 1.55 |
| Cyclobenzaprine | Morphine         | 0.89        | 0.71   | 1.13 |
| Metaxalone      | Morphine         | 0.88        | 0.49   | 1.58 |
| Methocarbamol   | Morphine         | 0.74        | 0.50   | 1.11 |
| Orphenadrine    | Morphine         | 0.71        | 0.27   | 1.84 |
| Tizanidine      | Morphine         | 0.94        | 0.75   | 1.19 |
| Baclofen        | Oxycodone        | 0.80        | 0.70   | 0.90 |
| Carisoprodol    | Oxycodone        | 0.90        | 0.78   | 1.04 |



|                        |             |      |      |      |
|------------------------|-------------|------|------|------|
| <b>Chlorzoxazone</b>   | Oxycodone   | 1.00 | 0.62 | 1.62 |
| <b>Cyclobenzaprine</b> | Oxycodone   | 0.77 | 0.72 | 0.82 |
| <b>Dantrolene</b>      | Oxycodone   | 1.16 | 0.45 | 3.02 |
| <b>Metaxalone</b>      | Oxycodone   | 0.69 | 0.56 | 0.85 |
| <b>Methocarbamol</b>   | Oxycodone   | 0.75 | 0.65 | 0.86 |
| <b>Orphenadrine</b>    | Oxycodone   | 0.63 | 0.46 | 0.87 |
| <b>Tizanidine</b>      | Oxycodone   | 0.90 | 0.81 | 0.99 |
| <b>Baclofen</b>        | Oxymorphone | 1.76 | 0.98 | 3.18 |
| <b>Carisoprodol</b>    | Oxymorphone | 0.89 | 0.47 | 1.69 |
| <b>Cyclobenzaprine</b> | Oxymorphone | 0.88 | 0.47 | 1.65 |
| <b>Metaxalone</b>      | Oxymorphone | 1.46 | 0.57 | 3.72 |
| <b>Methocarbamol</b>   | Oxymorphone | 1.23 | 0.68 | 2.22 |
| <b>Tizanidine</b>      | Oxymorphone | 0.69 | 0.46 | 1.05 |
| <b>Baclofen</b>        | Tapentadol  | 0.62 | 0.34 | 1.14 |
| <b>Carisoprodol</b>    | Tapentadol  | 1.09 | 0.48 | 2.49 |
| <b>Cyclobenzaprine</b> | Tapentadol  | 0.75 | 0.40 | 1.40 |
| <b>Metaxalone</b>      | Tapentadol  | 0.75 | 0.29 | 1.92 |
| <b>Methocarbamol</b>   | Tapentadol  | 1.00 | 0.45 | 2.22 |
| <b>Tizanidine</b>      | Tapentadol  | 0.95 | 0.58 | 1.54 |
| <b>Baclofen</b>        | Tramadol    | 1.07 | 0.94 | 1.21 |
| <b>Carisoprodol</b>    | Tramadol    | 0.84 | 0.69 | 1.03 |
| <b>Chlorzoxazone</b>   | Tramadol    | 1.06 | 0.64 | 1.76 |
| <b>Cyclobenzaprine</b> | Tramadol    | 0.99 | 0.92 | 1.07 |
| <b>Dantrolene</b>      | Tramadol    | 1.00 | 0.40 | 2.46 |
| <b>Metaxalone</b>      | Tramadol    | 1.14 | 0.92 | 1.42 |
| <b>Methocarbamol</b>   | Tramadol    | 1.15 | 0.97 | 1.36 |
| <b>Orphenadrine</b>    | Tramadol    | 0.73 | 0.52 | 1.03 |
| <b>Tizanidine</b>      | Tramadol    | 0.97 | 0.88 | 1.08 |

CI= confidence interval; RR= rate ratio

**Supplemental Table S5.** Summary of unadjusted and adjusted signals, with and without semi-Bayes shrinkage, for muscle relaxants plus candidate interacting precipitant and unintentional traumatic injury, typical hip fracture, and motor vehicle crash in which the subject was driving

| Outcomes of interest                            | Object drug cohort | Unadjusted analyses                              |                                                    |                                                   | Adjusted analyses                                |                                                    |                                                   |
|-------------------------------------------------|--------------------|--------------------------------------------------|----------------------------------------------------|---------------------------------------------------|--------------------------------------------------|----------------------------------------------------|---------------------------------------------------|
|                                                 |                    | Candidate interacting precipitants examined, sum | Before semi-Bayes shrinkage, DDI signals, sum (%)* | After semi-Bayes shrinkage, DDI signals, sum (%)* | Candidate interacting precipitants examined, sum | Before semi-Bayes shrinkage, DDI signals, sum (%)* | After semi-Bayes shrinkage, DDI signals, sum (%)* |
| <b>Unintentional traumatic injury (primary)</b> | Baclofen           | 396                                              | 10 (2.5)                                           | 4 (1.0)                                           | 396                                              | 15 (3.8)                                           | 5 (1.3)                                           |
|                                                 | Carisoprodol       | 357                                              | 4 (1.1)                                            | 1 (0.3)                                           | 357                                              | 5 (1.4)                                            | 2 (0.6)                                           |
|                                                 | Chlorzoxazone      | 128                                              | 2 (1.6)                                            | 0 (0.0)                                           | 128                                              | 3 (2.3)                                            | 2 (1.6)                                           |
|                                                 | Cyclobenzaprine    | 465                                              | 7 (1.5)                                            | 3 (0.6)                                           | 465                                              | 4 (0.9)                                            | 0 (0.0)                                           |
|                                                 | Dantrolene         | 13                                               | 1 (7.7)                                            | 0 (0.0)                                           | 13                                               | 1 (7.7)                                            | 0 (0.0)                                           |
|                                                 | Metaxalone         | 268                                              | 5 (1.9)                                            | 1 (0.4)                                           | 268                                              | 3 (1.1)                                            | 0 (0.0)                                           |
|                                                 | Methocarbamol      | 322                                              | 12 (3.7)                                           | 4 (1.2)                                           | 323                                              | 11 (3.4)                                           | 4 (1.2)                                           |
|                                                 | Orphenadrine       | 165                                              | 4 (2.4)                                            | 1 (0.6)                                           | 165                                              | 3 (1.8)                                            | 0 (0.0)                                           |
|                                                 | Tizanidine         | 428                                              | 5 (1.2)                                            | 3 (0.7)                                           | 428                                              | 5 (1.2)                                            | 3 (0.7)                                           |
| <b>Typical hip fracture (secondary)</b>         | Baclofen           | 137                                              | 1 (0.7)                                            | 0 (0.0)                                           | 129                                              | 3 (2.3)                                            | 0 (0.0)                                           |
|                                                 | Carisoprodol       | 96                                               | 1 (1.0)                                            | 0 (0.0)                                           | 91                                               | 4 (4.4)                                            | 0 (0.0)                                           |
|                                                 | Chlorzoxazone      | 6                                                | 0 (0.0)                                            | 0 (0.0)                                           | 6                                                | 1 (16.7)                                           | 0 (0.0)                                           |
|                                                 | Cyclobenzaprine    | 189                                              | 0 (0.0)                                            | 0 (0.0)                                           | 179                                              | 9 (5.0)                                            | 0 (0.0)                                           |
|                                                 | Dantrolene         | -                                                | -                                                  | -                                                 | -                                                | -                                                  | -                                                 |
|                                                 | Metaxalone         | 35                                               | 0 (0.0)                                            | 0 (0.0)                                           | 32                                               | 0 (0.0)                                            | 0 (0.0)                                           |
|                                                 | Methocarbamol      | 57                                               | 1 (1.8)                                            | 0 (0.0)                                           | 53                                               | 2 (3.8)                                            | 0 (0.0)                                           |
|                                                 | Orphenadrine       | 12                                               | 0 (0.0)                                            | 0 (0.0)                                           | 9                                                | 1 (11.1)                                           | 0 (0.0)                                           |
|                                                 | Tizanidine         | 142                                              | 3 (2.1)                                            | 0 (0.0)                                           | 140                                              | 3 (2.1)                                            | 0 (0.0)                                           |
| <b>Motor vehicle crash (secondary)</b>          | Baclofen           | 75                                               | 0 (0.0)                                            | 0 (0.0)                                           | 63                                               | 0 (0.0)                                            | 0 (0.0)                                           |
|                                                 | Carisoprodol       | 54                                               | 0 (0.0)                                            | 0 (0.0)                                           | 47                                               | 3 (6.4)                                            | 0 (0.0)                                           |
|                                                 | Chlorzoxazone      | 1                                                | 0 (0.0)                                            | 0 (0.0)                                           | -                                                | -                                                  | -                                                 |
|                                                 | Cyclobenzaprine    | 112                                              | 0 (0.0)                                            | 0 (0.0)                                           | 96                                               | 1 (1.0)                                            | 0 (0.0)                                           |
|                                                 | Dantrolene         | -                                                | -                                                  | -                                                 | -                                                | -                                                  | -                                                 |
|                                                 | Metaxalone         | 10                                               | 0 (0.0)                                            | 0 (0.0)                                           | 8                                                | 0 (0.0)                                            | 0 (0.0)                                           |
|                                                 | Methocarbamol      | 26                                               | 0 (0.0)                                            | 0 (0.0)                                           | 19                                               | 1 (5.3)                                            | 0 (0.0)                                           |
|                                                 | Orphenadrine       | 2                                                | 0 (0.0)                                            | 0 (0.0)                                           | -                                                | -                                                  | -                                                 |
|                                                 | Tizanidine         | 105                                              | 1 (1.0)                                            | 0 (0.0)                                           | 93                                               | 5 (5.4)                                            | 0 (0.0)                                           |

DDI = drug-drug interaction

\* lower bound of the 95% confidence interval for the RR of interest excluded the null value
